# Supplementary material
Source: publisher site journal article supplement (https://www.dovepress.com/article/supplementary_file/623174/623174%20Revised%20Supplementary%20Information.docx)
Supplement: Supplementary file 1 [file 623174%20Revised%20Supplementary%20Information.docx]

**Supplementary Table 1.** Excluded variables with missing rate >30%

| **Excluded Variables** | **Missing Rate (%)** |
| --- | --- |
| LDL-C (mmol/L) | 36.08 |
| HDL-C (mmol/L) | 36.17 |
| hs-cTnI (ng/mL) | 55.24 |
| CK-MB (U/L) | 87.16 |
| Myoglobin (ng/mL) | 34.73 |
| FBG (mmol/L) | 55.61 |
| HbA1c (%) | 77.18 |
| eGFR (mL/min/1.73m²) | 84.13 |
| Cystatin C (mg/L) | 73.11 |
| LDH (U/L) | 78.36 |
| GGT (U/L) | 43.79 |
| TBA (μmol/L) | 55.16 |
| Mg (mmol/L) | 44.17 |

Abbreviations: **LDL-C**, low-density lipoprotein cholesterol; **HDL-C**, high-density lipoprotein cholesterol; **hs-cTnI**, high-sensitivity cardiac troponin I; **CK-MB**, creatine kinase-MB; **FBG**, fasting blood glucose; **HbA1c**, glycated hemoglobin; **eGFR**, estimated glomerular filtration rate; **LDH**, lactate dehydrogenase; **GGT**, gamma-glutamyl transferase; **TBA**, total bile acid; **Mg**, magnesium.

**Supplementary Table 2.** Imputation results for variables with missing rate below 30% in the training set

| **Variables** | **Before interpolation** | **After interpolation** | ***P* value** |
| --- | --- | --- | --- |
| Pulse rate (beats/min) | 88 (77, 100) | 88 (77, 100) | 0.939 |
| SBP (mmHg) | 131 (120, 143) | 131 (120, 143) | 0.945 |
| DBP (mmHg) | 78 (70, 87) | 78 (70, 87) | 0.792 |
| TC (mmol/L) | 3.98 (3.33, 4.67) | 3.98 (3.32, 4.67) | 0.803 |
| TG (mmol/L) | 0.95 (0.72, 1.3) | 0.94 (0.72, 1.29) | 0.412 |
| PT (s) | 13.2 (12.5, 14) | 13.1 (12.5, 14) | 0.851 |
| FIB (g/L) | 3.88 (3.12, 4.97) | 3.88 (3.12, 4.97) | 0.984 |
| D-D (mg/L) | 0.36 (0.22, 0.67) | 0.36 (0.22, 0.67) | 0.898 |
| PLT count (×10^9/L) | 194 (153, 245) | 194 (153, 245) | 0.898 |
| WBC count (×10^9/L) | 7.3 (5.6, 9.6) | 7.3 (5.6, 9.7) | 0.538 |
| NEUT count (×10^9/L) | 5.36 (3.82, 7.83) | 5.38 (3.85, 7.82) | 0.713 |
| LYM count (×10^9/L) | 1 (0.69, 1.4) | 1.01 (0.69, 1.42) | 0.225 |
| MONO count (×10^9/L) | 0.47 (0.35, 0.64) | 0.47 (0.35, 0.64) | 0.522 |
| CRP (mg/L) | 5.62 (1.26, 23.2) | 5.32 (1.1, 21.79) | 0.028 |
| BUN (mmol/L) | 2.46 (1.92, 3.17) | 2.46 (1.92, 3.17) | 0.998 |
| CREA (μmol/L) | 69 (58, 85) | 69 (58, 85) | 0.894 |
| UA (μmol/L) | 324 (259, 398) | 324 (259, 398) | 0.980 |
| DBIL (μmol/L) | 4.13 (3, 5.9) | 4.1 (3, 5.9) | 0.923 |
| ALB (g/L) | 38.54 (35.58, 41.26) | 38.57 (35.59, 41.27) | 0.856 |
| PAB (mg/L) | 177.58 (129.54, 222.6) | 177.42 (129.24, 222.37) | 0.759 |
| K⁺ (mmol/L) | 3.82 (3.5, 4.14) | 3.82 (3.5, 4.14) | 0.603 |
| P (mmol/L) | 1.06 (0.91, 1.21) | 1.06 (0.9, 1.2) | 0.182 |
| Na⁺ (mmol/L) | 140 (137, 142) | 140 (137, 142) | 0.859 |
| Ca²⁺ (mmol/L) | 2.21 (2.11, 2.3) | 2.21 (2.12, 2.3) | 0.296 |

Abbreviations: **SBP**, systolic blood pressure; **DBP**, diastolic blood pressure; **TC**, total cholesterol; **TG**, triglycerides; **PT**, prothrombin time; **FIB**, fibrinogen; **D-D**, D-dimer; **PLT**, platelet; **WBC**, white blood cell; **NEUT**, neutrophil; **LYM**, lymphocyte; **MONO**, monocyte; **CRP**, C-reactive protein; **BUN**, blood urea nitrogen; **CREA**, creatinine; **UA**, uric acid; **DBIL**, direct bilirubin; **ALB**, albumin; **PAB**, prealbumin; **K⁺**, potassium; **P**, phosphorus; **Na⁺**, sodium; **Ca²⁺**, calcium.

**Supplementary Table 3.** Imputation results for variables with missing rate below 30% in the validation set

| **Variables** | **Before interpolation** | **After interpolation** | ***P* value** |
| --- | --- | --- | --- |
| Pulse rate (beats/min) | 87 (77, 100) | 87 (77, 100) | 0.971 |
| SBP (mmHg) | 130 (120, 142) | 130 (120, 142) | 0.899 |
| DBP (mmHg) | 78 (70, 86) | 78 (70, 86) | 0.932 |
| TC (mmol/L) | 4.01 (3.36, 4.67) | 4 (3.35, 4.66) | 0.748 |
| TG (mmol/L) | 0.94 (0.72, 1.29) | 0.94 (0.72, 1.29) | 0.901 |
| PT (s) | 13.1 (12.5, 13.9) | 13.1 (12.5, 13.9) | 0.940 |
| FIB (g/L) | 3.88 (3.12, 4.97) | 3.89 (3.13, 4.97) | 0.702 |
| D-D (mg/L) | 0.35 (0.21, 0.64) | 0.35 (0.2, 0.63) | 0.280 |
| PLT count (×10^9/L) | 192 (153, 241) | 193 (153, 241) | 0.841 |
| WBC count (×10^9/L) | 7.3 (5.6, 9.7) | 7.3 (5.6, 9.7) | 0.925 |
| NEUT count (×10^9/L) | 5.38 (3.86, 7.81) | 5.37 (3.85, 7.82) | 0.975 |
| LYM count (×10^9/L) | 1.02 (0.7, 1.42) | 1.02 (0.7, 1.42) | 0.866 |
| MONO count (×10^9/L) | 0.47 (0.35, 0.64) | 0.47 (0.35, 0.64) | 0.951 |
| CRP (mg/L) | 5.24 (1.11, 21.07) | 5.04 (0.89, 19.79) | 0.132 |
| BUN (mmol/L) | 2.5 (1.92, 3.21) | 2.5 (1.92, 3.17) | 0.747 |
| CREA (μmol/L) | 70 (58, 85) | 70 (58, 85) | 0.986 |
| UA (μmol/L) | 325 (261, 395) | 325 (260, 395) | 0.923 |
| DBIL (μmol/L) | 4.1 (3, 5.8) | 4.1 (3, 5.8) | 0.772 |
| ALB (g/L) | 38.49 (35.7, 41.24) | 38.49 (35.7, 41.24) | 0.932 |
| PAB (mg/L) | 181.13 (133.56, 228.25) | 181.44 (133.59, 228.44) | 0.916 |
| K⁺ (mmol/L) | 3.81 (3.5, 4.14) | 3.82 (3.5, 4.14) | 0.667 |
| P (mmol/L) | 1.05 (0.91, 1.2) | 1.05 (0.9, 1.2) | 0.574 |
| Na⁺ (mmol/L) | 140 (137.6, 142) | 140 (137.7, 142) | 0.858 |
| Ca²⁺ (mmol/L) | 2.21 (2.11, 2.3) | 2.21 (2.11, 2.3) | 0.561 |

Abbreviations: **SBP**, systolic blood pressure; **DBP**, diastolic blood pressure; **TC**, total cholesterol; **TG**, triglycerides; **PT**, prothrombin time; **FIB**, fibrinogen; **D-D**, D-dimer; **PLT**, platelet; **WBC**, white blood cell; **NEUT**, neutrophil; **LYM**, lymphocyte; **MONO**, monocyte; **CRP**, C-reactive protein; **BUN**, blood urea nitrogen; **CREA**, creatinine; **UA**, uric acid; **DBIL**, direct bilirubin; **ALB**, albumin; **PAB**, prealbumin; **K⁺**, potassium; **P**, phosphorus; **Na⁺**, sodium; **Ca²⁺**, calcium.

**Supplementary Table 4.** Variance inflation factor (VIF) and tolerance for all candidate variables prior to LASSO regression

| **Variables** | **VIF (before)** | **Tolerance (before)** | **VIF (after)** | **Tolerance (after)** |
| --- | --- | --- | --- | --- |
| Age (years) | 1.259 | 0.794 | 1.258 | 0.795 |
| Gender | 1.702 | 0.588 | 1.701 | 0.588 |
| Marital status | 1.033 | 0.968 | 1.033 | 0.968 |
| Smoking history | 1.704 | 0.587 | 1.704 | 0.587 |
| Drinking history | 1.176 | 0.850 | 1.176 | 0.850 |
| Surgical history | 1.010 | 0.990 | 1.010 | 0.990 |
| Hypertension | 1.222 | 0.818 | 1.222 | 0.818 |
| Diabetes | 1.086 | 0.921 | 1.085 | 0.922 |
| Chronic gastritis | 1.024 | 0.977 | 1.024 | 0.977 |
| Hypokalemia | 1.271 | 0.787 | 1.271 | 0.787 |
| Pulse rate (beats/min) | 1.227 | 0.815 | 1.226 | 0.816 |
| SBP (mmHg) | 1.937 | 0.516 | 1.937 | 0.516 |
| DBP (mmHg) | 1.801 | 0.555 | 1.800 | 0.556 |
| TC (mmol/L) | 1.417 | 0.706 | 1.419 | 0.705 |
| TG (mmol/L) | 1.285 | 0.778 | 1.302 | 0.768 |
| PT (s) | 1.116 | 0.896 | 1.115 | 0.897 |
| FIB (g/L) | 1.828 | 0.547 | 1.826 | 0.548 |
| D-D (mg/L) | 1.109 | 0.902 | 1.106 | 0.904 |
| PLT count (×10^9/L) | 1.244 | 0.804 | 1.243 | 0.804 |
| WBC count (×10^9/L) | 52.453 | 0.019 | — (excluded) | — |
| NEUT count (×10^9/L) | 28.378 | 0.035 | 1.608 | 0.622 |
| LYM count (×10^9/L) | 20.872 | 0.048 | 1.105 | 0.905 |
| MONO count (×10^9/L) | 1.884 | 0.531 | 1.357 | 0.737 |
| CRP (mg/L) | 1.694 | 0.590 | 1.693 | 0.591 |
| BUN (mmol/L) | 2.251 | 0.444 | 2.250 | 0.445 |
| CREA (μmol/L) | 1.869 | 0.535 | 1.869 | 0.535 |
| UA (μmol/L) | 1.378 | 0.726 | 1.378 | 0.726 |
| DBIL (μmol/L) | 1.055 | 0.948 | 1.055 | 0.947 |
| ALB (g/L) | 1.836 | 0.545 | 1.835 | 0.545 |
| PAB (mg/L) | 2.194 | 0.456 | 2.190 | 0.457 |
| K⁺ (mmol/L) | 1.521 | 0.657 | 1.520 | 0.658 |
| P (mmol/L) | 1.372 | 0.729 | 1.371 | 0.729 |
| Na⁺ (mmol/L) | 1.146 | 0.873 | 1.145 | 0.874 |
| Ca²⁺ (mmol/L) | 1.404 | 0.712 | 1.404 | 0.712 |

Abbreviations: **VIF**, variance inflation factor; **SBP**, systolic blood pressure; **DBP**, diastolic blood pressure; **TC**, total cholesterol; **TG**, triglycerides; **PT**, prothrombin time; **FIB**, fibrinogen; **D-D**, D-dimer; **PLT**, platelet; **WBC**, white blood cell; **NEUT**, neutrophil; **LYM**, lymphocyte; **MONO**, monocyte; **CRP**, C-reactive protein; **BUN**, blood urea nitrogen; **CREA**, creatinine; **UA**, uric acid; **DBIL**, direct bilirubin; **ALB**, albumin; **PAB**, prealbumin; **K⁺**, potassium; **P**, phosphorus; **Na⁺**, sodium; **Ca²⁺**, calcium.

**Supplementary Table 5.** Optimal hyperparameters of the XGBoost model

| **Hyperparameter** | **Optimal value** |
| --- | --- |
| n_estimators | 500 |
| max_depth | 7 |
| min_child_weight | 5 |
| learning_rate | 0.01 |
| subsample | 0.8 |
| colsample_bytree | 1.0 |
| gamma | 0.2 |
| random_state | 42 |
| reg_lambda | 0.2 |

**Supplementary Table 6.** Sensitivity analysis comparing complete-case analysis versus imputed datasets

| **Setting** | **Model** | **Complete-Case AUC** | **Imputed AUC** | **Difference** |
| --- | --- | --- | --- | --- |
| Training set | XGBoost | 0.862 | 0.871 | -0.009 |
|  | KNN | 0.736 | 0.741 | -0.005 |
|  | GBDT | 0.845 | 0.857 | -0.012 |
|  | ANN | 0.741 | 0.750 | -0.009 |
|  | RF | 0.755 | 0.773 | -0.018 |
|  | LR | 0.735 | 0.737 | -0.002 |
|  | DT | 0.714 | 0.721 | -0.007 |
|  | SVM | 0.779 | 0.789 | -0.010 |
|  | LightGBM | 0.782 | 0.803 | -0.021 |
| Validation set | XGBoost | 0.734 | 0.743 | -0.009 |
|  | KNN | 0.725 | 0.730 | -0.005 |
|  | GBDT | 0.729 | 0.741 | -0.012 |
|  | ANN | 0.728 | 0.736 | -0.008 |
|  | RF | 0.736 | 0.738 | -0.002 |
|  | LR | 0.733 | 0.736 | -0.003 |
|  | DT | 0.695 | 0.708 | -0.013 |
|  | SVM | 0.731 | 0.734 | -0.003 |
|  | LightGBM | 0.734 | 0.740 | -0.006 |

Abbreviations: **AUC**, area under the ROC curve; **XGBoost**, extreme Gradient Boosting; **KNN**, K-nearest Neighbors; **GBDT,** gradient boosting decision tree; **ANN**, artificial neural network; **RF**, random forest; **LR**, logistic regression; **DT**, decision tree; **SVM**, support vector machine; **LightGBM**, light gradient boosting machine.

**
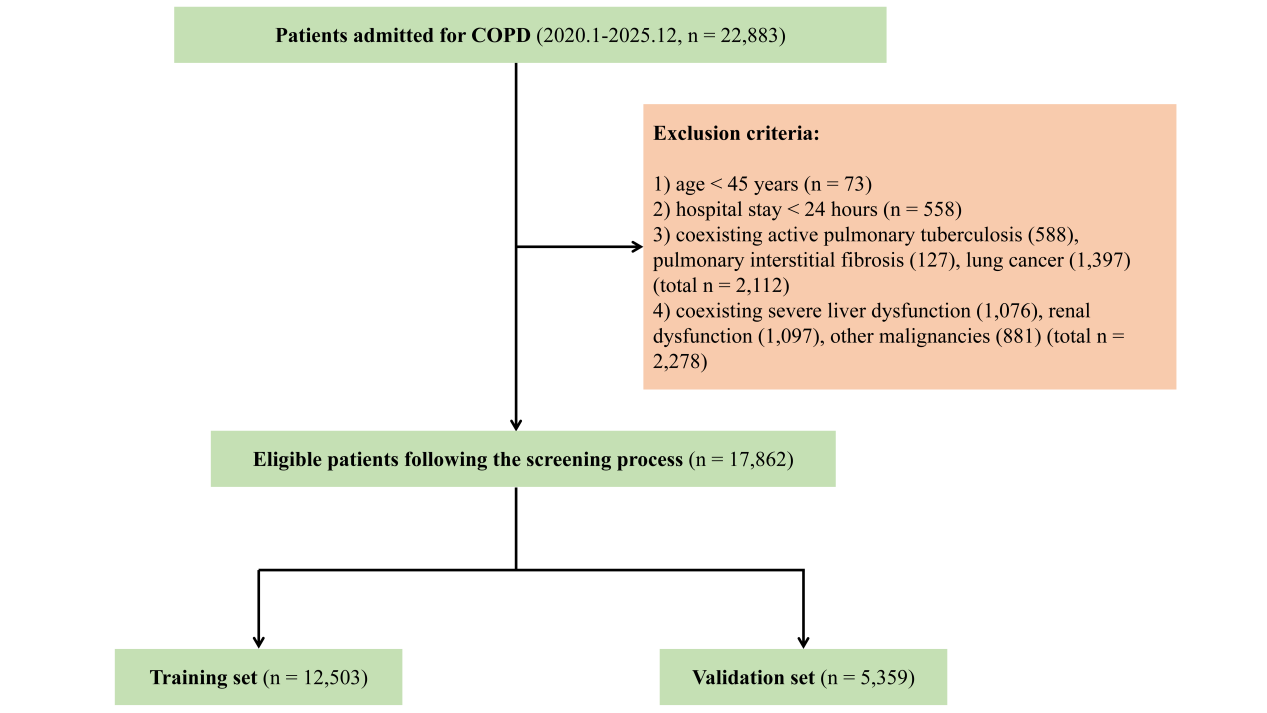
**

**Supplementary Figure 1.** Patient selection and data partitioning workflow
